# Supplementary material for: A Loss of Function in LprG−Rv1410c Homologues Attenuates Growth during Biofilm Formation in Mycobacterium smegmatis
Source: MDPI journal article supplement (doi:10.3390/pathogens12121375), 2023-11-21
Supplement: s1 [file s1]

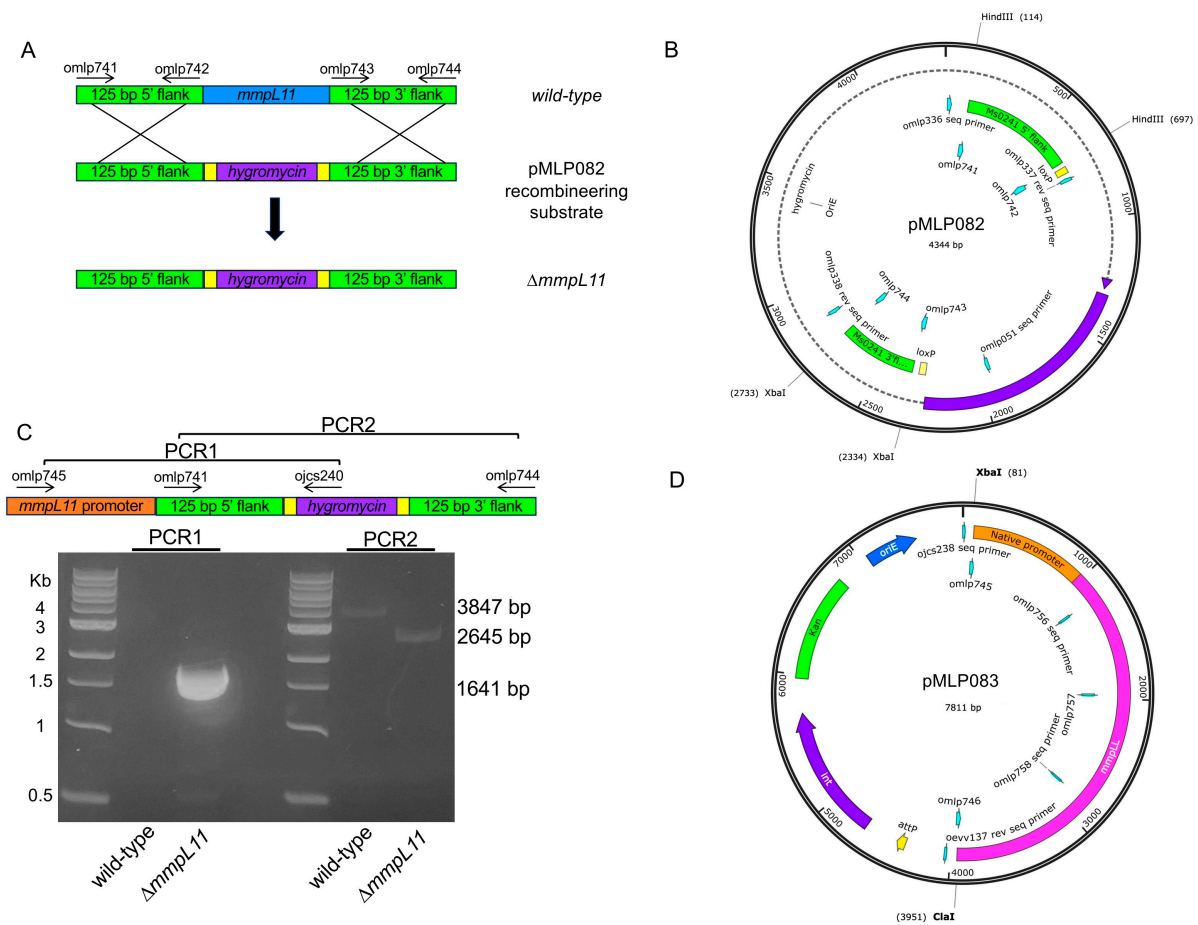

**Figure S1.** Generation and confirmation of *M. smegmatis*  $\Delta mmpL11$ . **(A)** Schematic of the recombineering strategy for generating *M. smegmatis*  $\Delta mmpL11$ . **(B)** Plasmid map for the pMLP082 plasmid used as the template for the recombineering substrate. **(C)** Schematic and results for PCR confirmation of recombination at the *mmpL11* locus. For PCR1 the predicted band size was 1641 bp. A corresponding product was observed only from  $\Delta mmpL11$  genomic DNA, indicating that *mmpL11* was successfully replaced by the hygromycin antibiotic gene cassette. For PCR2 the expected band size was 3847 bp for the wild type and 2645 bp for  $\Delta mmpL11$ . The expected shift in band PCR2 product size was observed for  $\Delta mmpL11$  vs. the wild type.  $\Delta mmpL11$  was further confirmed by sequencing the gel-purified PCR2 product from  $\Delta mmpL11$ . **(D)** Plasmid map depicting the *mmpL11* complement construct (pMLP083). Plasmid maps in B and D were generated using SnapGene.

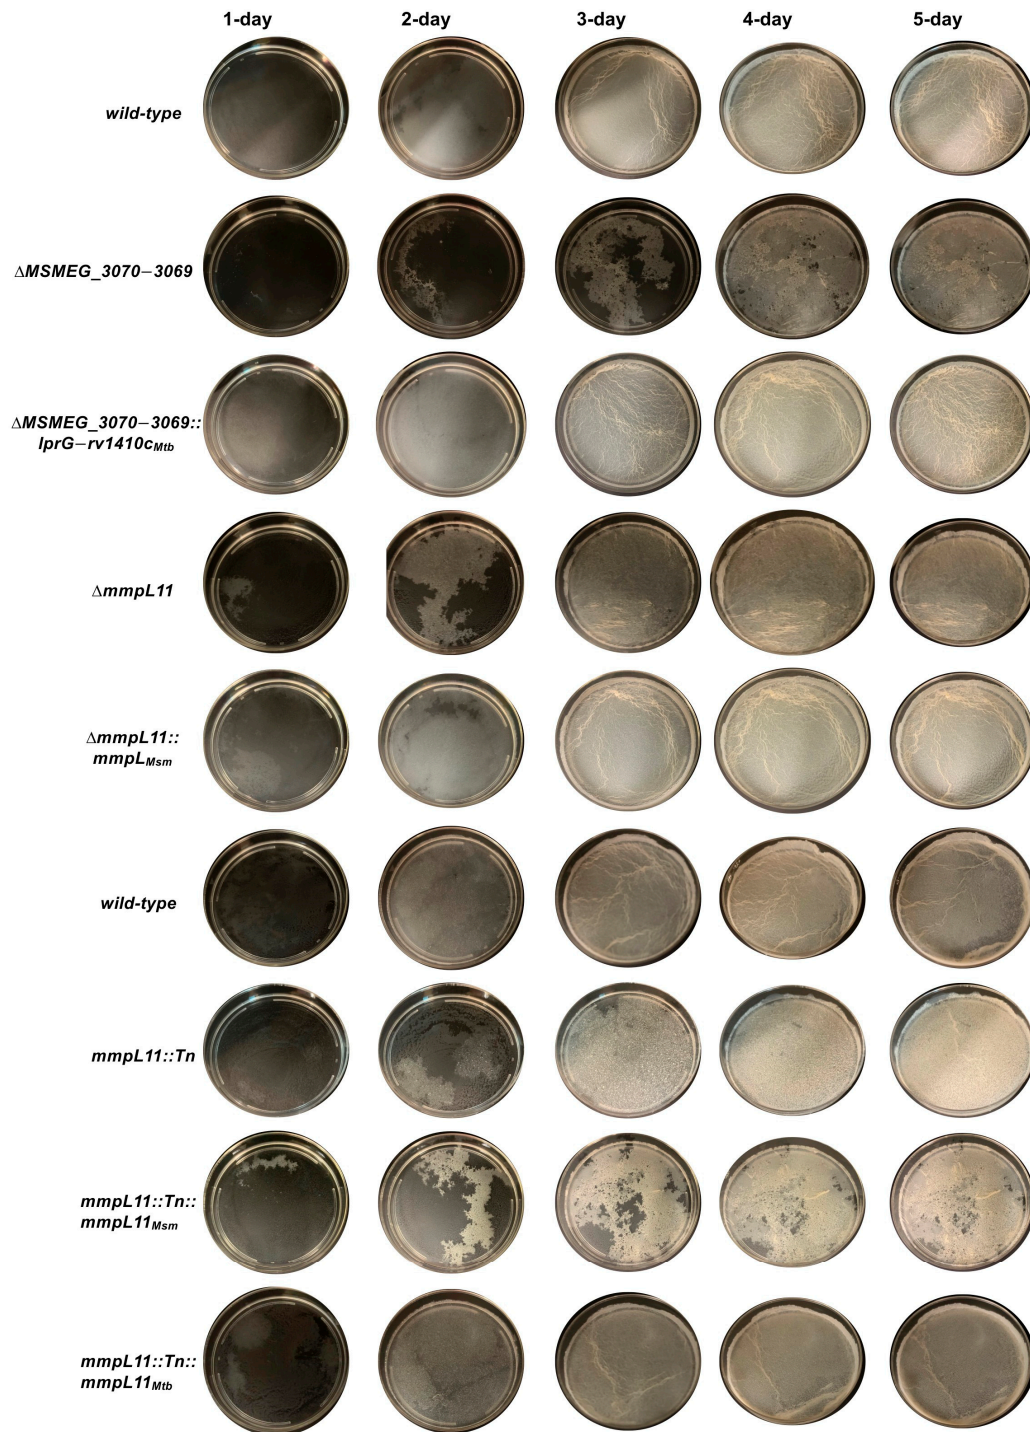

**Figure S2.** Five-day time course of pellicle biofilm formation at the air-liquid interface. Equal numbers of bacteria were inoculated into Sauton's medium without Tween 80 in polystyrene petri dishes and the plates were incubated at 30°C without disturbance for 5 days.  $\Delta$ MSMEG\_3070-3069,  $\Delta$ mmpL11, mmpL11::Tn and mmpL11::Tn::mmpL11<sub>Msm</sub> strains were defective in pellicle biofilm formation starting at the day 2 time point. Data at days 2 and 4 are shown in Figure 1A. Data shown are representative of three biological replicates.

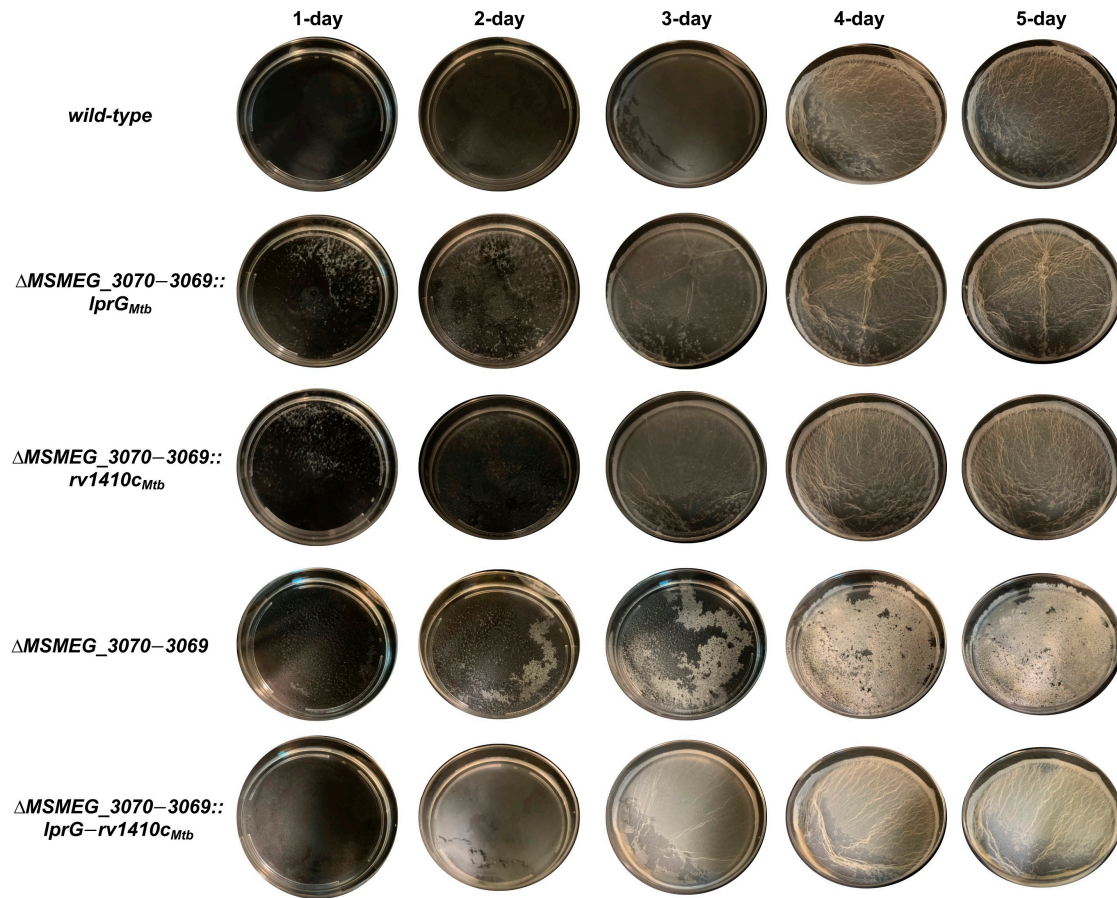

**Figure S3.** Five-day time course of  $\Delta MSMEG\_3070-3069$  mutant and complement strains pellicle biofilm formation at the air-liquid interface. Equal numbers of bacteria were inoculated into Sauton's medium without Tween 80 in polystyrene petri dishes and the plates were incubated at 30°C without disturbance for 5 days.  $\Delta MSMEG\_3070-3069::lprG_{Mtb}$  and  $\Delta MSMEG\_3070-3069::rv1410c_{Mtb}$  strains displayed wild type-like biofilm phenotype while  $\Delta MSMEG\_3070-3069$  strain was defective in pellicle biofilm formation starting at day 2. One biological replicate was performed as shown.

**Table S1.** Strains used in this study

| Species                                            | Genotype                                                      | Integration | Insert                      | Marker*                            | Source                |
|----------------------------------------------------|---------------------------------------------------------------|-------------|-----------------------------|------------------------------------|-----------------------|
| <i>Mycobacterium smegmatis</i> mc <sup>2</sup> 155 | Wild type**                                                   |             |                             |                                    | Farrow et al., 2008   |
|                                                    | $\Delta$ MSMEG_3070–3069                                      | none        | none                        | none                               | Farrow et al., 2008   |
|                                                    | $\Delta$ MSMEG_3070–3069:: <i>rv1410c</i>                     | L5 attB     | Phsp70– <i>rv1410c</i>      | Zeo <sup>R</sup>                   | Martinot et al., 2016 |
|                                                    | $\Delta$ MSMEG_3070–3069:: <i>lprG</i>                        | L5 attB     | Phsp70– <i>lprG</i>         | Zeo <sup>R</sup>                   | Martinot et al., 2016 |
|                                                    | $\Delta$ MSMEG_3070–3069:: <i>lprG–rv1410c</i>                | L5 attB     | Phsp70– <i>lprG–rv1410c</i> | Zeo <sup>R</sup>                   | Martinot et al., 2016 |
|                                                    | $\Delta$ <i>mmpL11</i> ***                                    | none        | none                        | Hyg <sup>R</sup>                   | This work             |
|                                                    | $\Delta$ <i>mmpL11</i> :: <i>mmpL11</i> (MSMEG_0241)          | L5 attB     | Pnative–MSMEG_0241          | Hyg <sup>R</sup> /Kan <sup>R</sup> | This work             |
|                                                    | Wild type**                                                   |             |                             |                                    | Pacheco et al., 2013  |
|                                                    | <i>mmpL11</i> :: <i>Tn</i>                                    | none        | pVV16                       | Kan <sup>R</sup>                   | Pacheco et al., 2013  |
|                                                    | <i>mmpL11</i> :: <i>Tn</i> ::<br><i>mmpLL1</i> <sub>MSM</sub> | none        | pVV16–MSMEG_0241            | Kan <sup>R</sup>                   | Pacheco et al., 2013  |
|                                                    | <i>mmpL11</i> :: <i>Tn</i> ::<br><i>mmpL11</i> <sub>Mtb</sub> | L5 attB     | Pnative– <i>mmpL11</i>      | Hyg <sup>R</sup> /Kan <sup>R</sup> | Pacheco et al., 2013  |

\*Zeo<sup>R</sup>: Zeocin; Hyg<sup>R</sup>: Hygromycin B; Kan<sup>R</sup>: Kanamycin

\*\* Lab-specific wild-type parent strains were shared by Dr. Eric Rubin for the MSMEG\_3070-3069 strains and Dr. Georgiana Purdy for the *mmpL11*::*Tn* strains.

\*\*\* Due to prevailing use in the literature, *mmpL11* is used to designate both the *M. tuberculosis* and *M. smegmatis* (MSMEG\_0241) homologues.

**Table S2.** Plasmids and primers used in this study

| Plasmid                                | Description                                                                                                                  |
|----------------------------------------|------------------------------------------------------------------------------------------------------------------------------|
| pJSC407                                | Mycobacteria knockout plasmid; Hyg <sup>R</sup>                                                                              |
| pMLP082                                | pJSC407 with 125 bp insertions from upstream and downstream of <i>mmpL11</i> (MSMEG_0241); Hyg <sup>R</sup>                  |
| pNIT-RecEt-SacB-Kan                    | Plasmid with Che9c RecET gene for recombineering in mycobacteria; Kan <sup>R</sup>                                           |
| pMV306                                 | Single-copy integrating plasmid with L5 integrase; integrates at mycobacteria chromosomal <i>attB</i> site; Kan <sup>R</sup> |
| pMLP083                                | pMV306:: <i>mmpL11</i> (MSMEG_0241) inserted via XbaI/ClaI sites; Kan <sup>R</sup>                                           |
| Primer                                 | Sequence                                                                                                                     |
| <b>Gene deletion construct</b>         |                                                                                                                              |
| omlp741                                | TGGATCCACGAAGCTTTGGTCAGAGCCTGGTTGGTC                                                                                         |
| omlp742                                | GGCCACCATGAAGCTTCTACAAGCGCATCATGAAGTCTGGATG                                                                                  |
| omlp743                                | CGGACAGGACTCTAGACTGGAGGAGGCGAAGTGACG                                                                                         |
| omlp744                                | CCGGGGATCCTCTAGAGCACGAGAACTTCCGACAG                                                                                          |
| <b>Complementation construct</b>       |                                                                                                                              |
| omlp745                                | GATCTTTAAATCTAGAGTGTCAGTTTCTTGCCTTGC                                                                                         |
| omlp746                                | ACTACGTCGACATCGATTCACTTCGCCTCCTCCAGCATTG                                                                                     |
| <b>PCR validation of gene deletion</b> |                                                                                                                              |
| ojcs240                                | CAGGCTCGCGTAGGAATCATC                                                                                                        |
| <b>DNA sequencing</b>                  |                                                                                                                              |
| oevv137                                | GATGGCATAAAACGAAAGGCC                                                                                                        |
| ojcs238                                | GCCTTTGAGTGAGCTGATACC                                                                                                        |
| omlp336                                | CGCCTGATCAGGATCGTAATAC                                                                                                       |
| omlp337                                | GACCTCGACGACCTGCAG                                                                                                           |
| omlp338                                | CTGACGCTCAGTGGAAACG                                                                                                          |
| omlp051                                | CATCTTCGTGGACCTGGCC                                                                                                          |
| omlp756                                | CTACCTCGCTCTCAACCAGTC                                                                                                        |
| omlp757                                | GTCACCGGCATCTACCTCATC                                                                                                        |
| omlp758                                | GATCAGCTCCCTGGACA                                                                                                            |
| <b>RT-qPCR</b>                         |                                                                                                                              |
| olmn045                                | ACTGGAGACCGACGATCTGA                                                                                                         |
| olmn046                                | GAGAACTTCCGACAGGGCTT                                                                                                         |
| olmn021                                | CAGAAGGTCGGTATCCACGG                                                                                                         |
| olmn022                                | ACGATCGGCATGTTCCACTT                                                                                                         |
| olmn055                                | GTGACGTCGTGGTCATTCCT                                                                                                         |
| olmn056                                | GGATCGGTAACGCAAATGGC                                                                                                         |
| olmn023                                | TCGTGATGAAGCGTGAGGAC                                                                                                         |
| olmn024                                | CAGACCGTTCTGGATCACCC                                                                                                         |
| olmn047                                | TCGCGTCAAGCAGATCAAGT                                                                                                         |
| olmn048                                | CTTCTTCAGGTCGGTCTCGG                                                                                                         |
| olmn049                                | ACATCGAGAGCACGTGGAAG                                                                                                         |
| olmn050                                | ATGTCCAGACGGGTCATGTG                                                                                                         |
| olmn051                                | TGTCCAAGGGCATCCACATC                                                                                                         |

|         |                       |
|---------|-----------------------|
| olmn052 | GCGACGGTCATCCAGTTGTA  |
| olmn025 | ACCCGCAGCAGTTCATCTAC  |
| olmn026 | TGTTCCGATCGTTGGTCGAA  |
| olmn027 | AGTTCAGTTCCAGAGTGGCG  |
| olmn028 | CGGAGTCGAGGAACATCTCG  |
| olmn029 | CCCGGAGCAGTTCATCTACG  |
| olmn030 | GATGTTGACCATCGGGTCGT  |
| ohvp088 | GAAGACACCGACCTGGA ACT |
| ohvp089 | GACTCTTCCTCGTCCCACAC  |
